# Supplementary material for: Cognitive-Behavioral Predictors of Individual Variability of Functional Connectivity in Healthy Young Adults
Source: Research Square preprint supplement (doi:10.21203/rs.3.rs-9683033/v1), 2026-06-07

**Table 1:** Spearman’s correlation (Rho) matrix across demographic and behavioral variables.


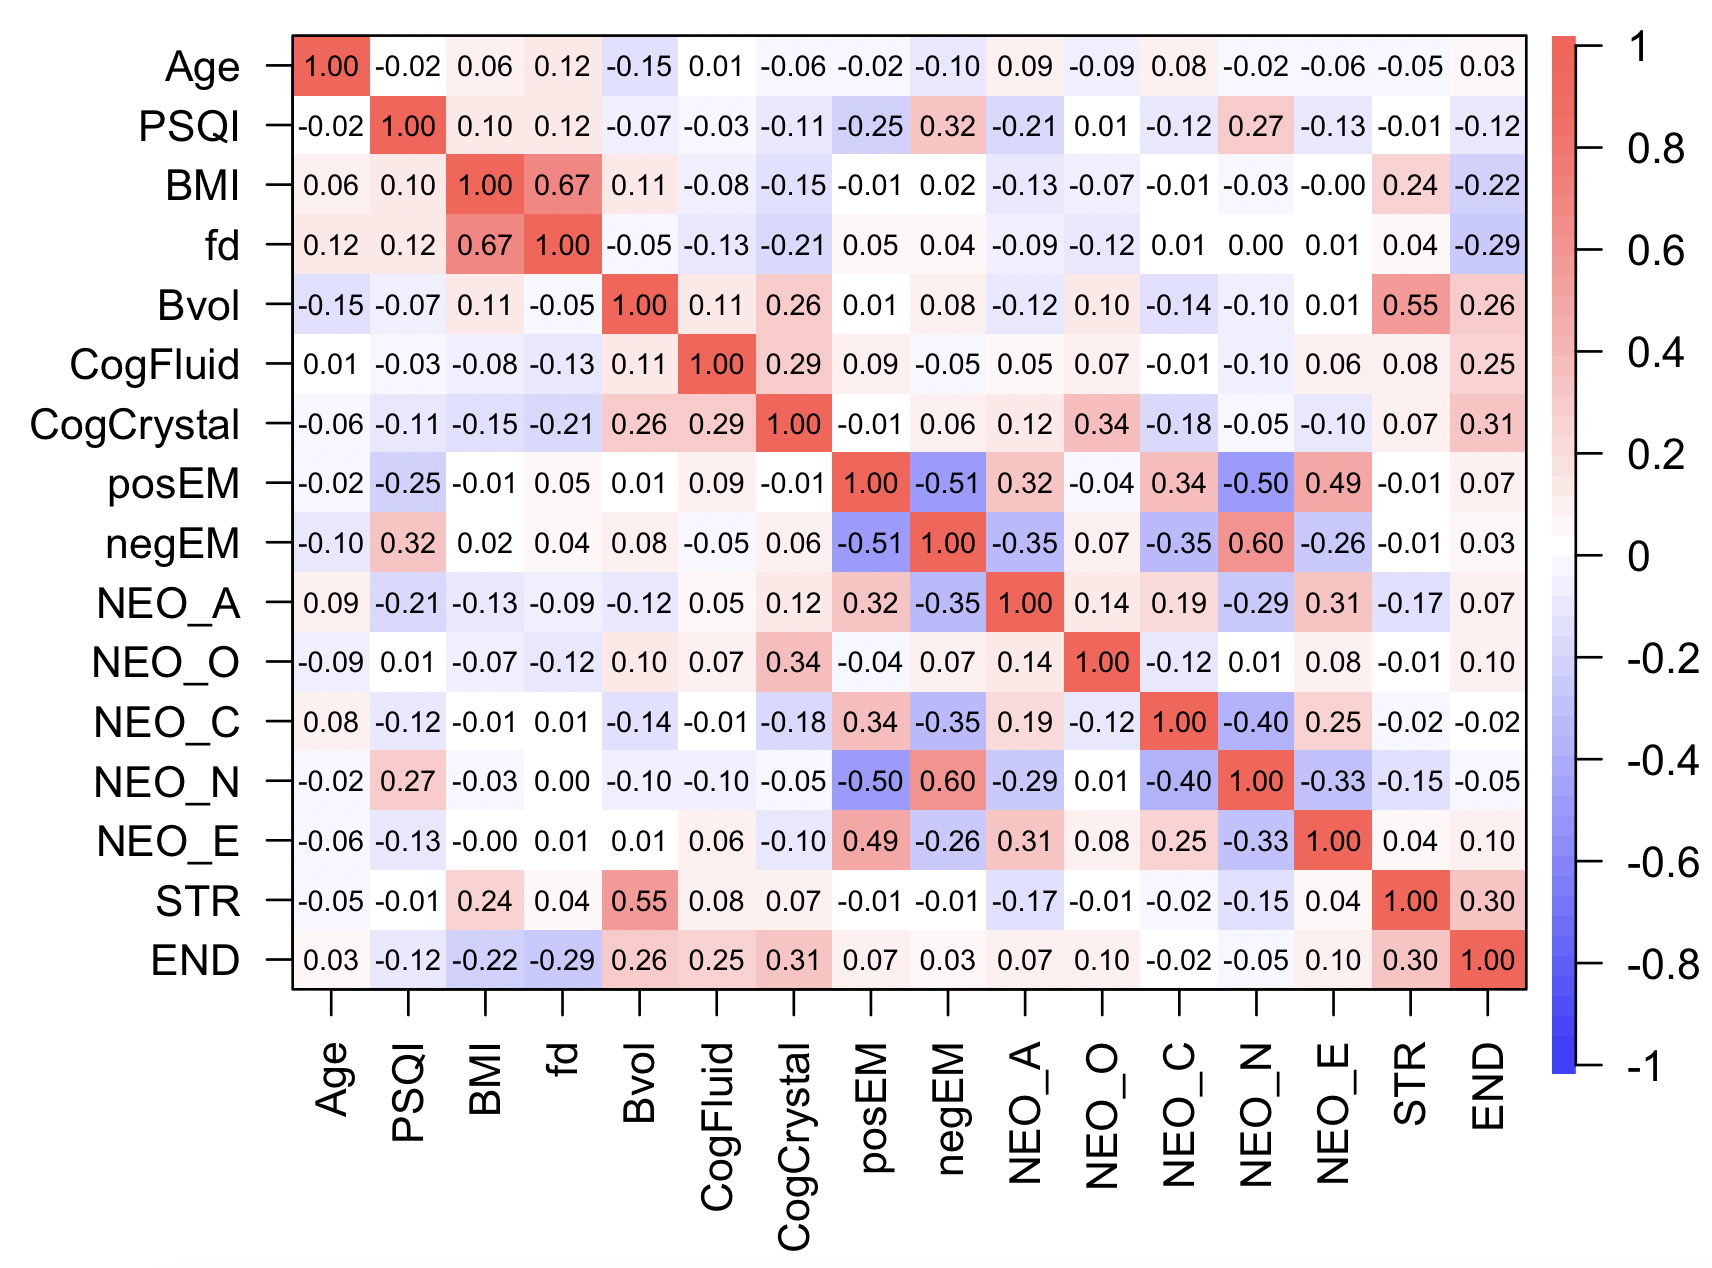


BMI = body mass index, PSQI = Pittsburgh Sleep Quality Index (total score), fd = mean framewise displacement, Bvol = brain volume, EM are emotional scores from a PCA of the NIH toolbox.

**Table 2:** Hierarchical regression results for all models.


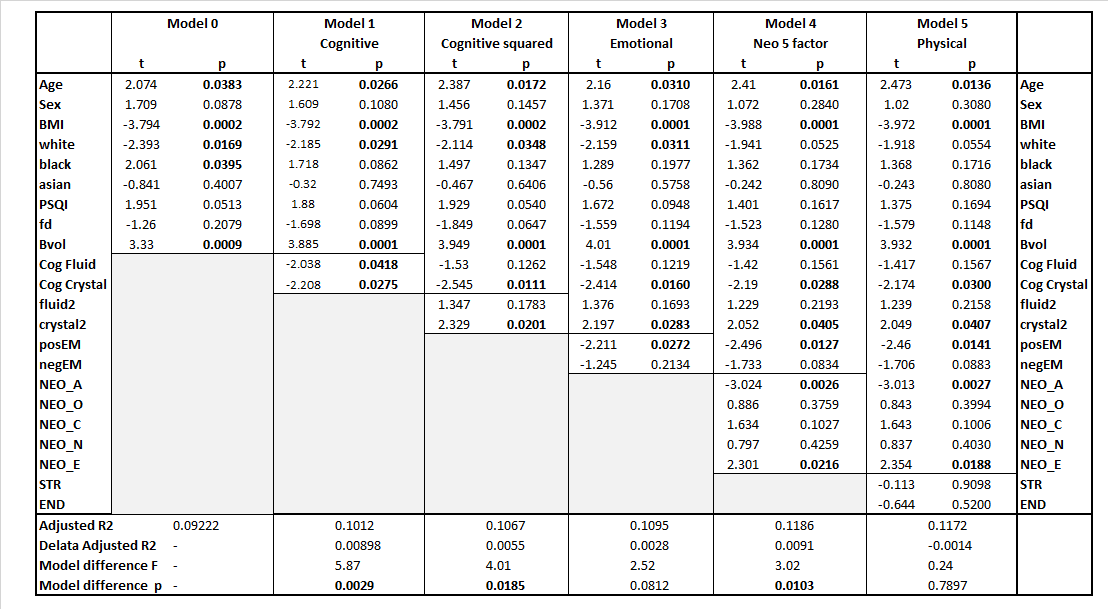


Note. BMI = body mass index, PSQI = Pittsburgh Sleep Quality Index (total score), fd = mean framewise displacement, Bvol = brain volume, fluid2 and crustal2 are squared cognitive scores, EM are emotional scores from a PCA of the NIH toolbox.

**Table 3:** Model 4 repeated in only males (n = 460) and only females (n = 527).


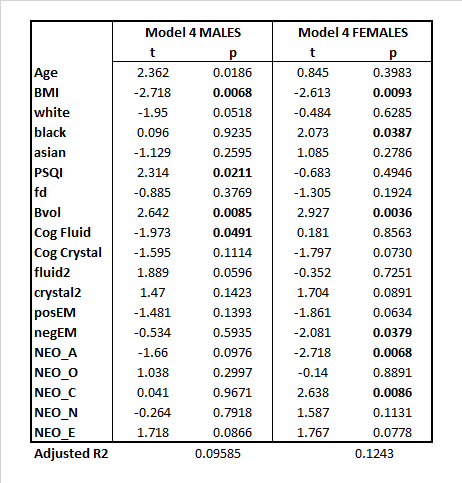

Supplement: Supplementary file 1 [file 7d1307845654ccb640726116.docx]
